# Supplementary material for: Extracorporeal albumin dialysis in critically ill patients with liver failure: Comparison of four different devices—A retrospective analysis
Source: PubMed Central journal article supplement (PMC10483887; doi:10.1177/03913988231191952), 2023-08-23
Supplement: sj-pdf-1-jao-10.1177_03913988231191952.pdf [file sj-pdf-1-jao-10.1177_03913988231191952.pdf]

# **Extracorporeal albumin dialysis in critically ill patients with liver failure: comparison four different devices– a retrospective analysis**

## **-Supplemental data -**

Oliver Sommerfeld; Caroline Neumann; Jan Becker Christian von Loeffelholz; Johannes Roth; Andreas Kortgen; Michael Bauer; Christoph Sponholz

Friedrich-Schiller-University Jena, Jena University Hospital, Department of Anaesthesiology and Critical Care Medicine, Jena, Germany

Corresponding author

Oliver Sommerfeld  
Friedrich-Schiller-University Jena,  
Jena University Hospital,  
Department of Anaesthesiology and Critical Care Medicine,  
Am Klinikum 1  
07747 Jena, Germany  
Tel.: +49 – 3641 – 9323294  
Fax: +49 – 3641 – 9323102  
eMail: [oliver.sommerfeld@med.uni-jena.de](mailto:oliver.sommerfeld@med.uni-jena.de)

Table S1a: Changes in laboratory markers and clinical scorings during ECAD treatment in MARS and ADVOS

|                |                         | pre-MARS |                    |      | post-MARS          |              |      | p-value            | pre-ADVOS |                    |              | post-ADVOS |  |  | p-value |
|----------------|-------------------------|----------|--------------------|------|--------------------|--------------|------|--------------------|-----------|--------------------|--------------|------------|--|--|---------|
| Bilirubin      | [ $\mu\text{mol/l}$ ]   | 389      | [ 303,8 - 554,0 ]  | 369  | [ 278,0 - 494,0 ]  | <b>0.001</b> | 298  | [ 172,0 - 424,0 ]  | 261,0     | [ 168,5 - 382,0 ]  | <b>0.001</b> |            |  |  |         |
| AST            | [ $\mu\text{mol/l.s}$ ] | 2,03     | [ 1,045 - 3,900 ]  | 1,93 | [ 1,073 - 3,805 ]  | 0.992        | 3,23 | [ 1,450 - 12,900 ] | 3,12      | [ 1,600 - 11,900 ] | <b>0.007</b> |            |  |  |         |
| ALT            | [ $\mu\text{mol/l.s}$ ] | 1,13     | [ 0,575 - 1,770 ]  | 1,04 | [ 0,570 - 2,060 ]  | 0.543        | 1,86 | [ 0,665 - 9,963 ]  | 1,79      | [ 0,825 - 8,610 ]  | <b>0.001</b> |            |  |  |         |
| GLDH           | [ $\text{nmol/l.s}$ ]   | 84       | [ 50,0 - 329,5 ]   | 89   | [ 50,0 - 336,5 ]   | 0.469        | 140  | [ 50,0 - 1621,0 ]  | 129       | [ 50,0 - 1275,5 ]  | <b>0.001</b> |            |  |  |         |
| $\mu$ -GT      | [ $\mu\text{mol/l.s}$ ] | 1,08     | [ 0,568 - 4,083 ]  | 1,07 | [ 0,495 - 4,490 ]  | <b>0.005</b> | 2,44 | [ 0,880 - 3,930 ]  | 2,10      | [ 0,900 - 3,900 ]  | 0.375        |            |  |  |         |
| AP             | [ $\mu\text{mol/l.s}$ ] | 2,35     | [ 1,628 - 9,470 ]  | 2,62 | [ 1,570 - 7,630 ]  | 0.107        | 2,87 | [ 1,755 - 6,795 ]  | 2,94      | [ 1,528 - 6,993 ]  | 0.365        |            |  |  |         |
| Creatinine     | [ $\mu\text{mol/l}$ ]   | 113      | [ 68,8 - 153,0 ]   | 83   | [ 61,8 - 160,5 ]   | <b>0.001</b> | 141  | [ 82,0 - 215,0 ]   | 117       | [ 72,5 - 177,0 ]   | <b>0.001</b> |            |  |  |         |
| Urea           | [ $\text{mmol/l}$ ]     | 16,0     | [ 10,28 - 22,25 ]  | 16,2 | [ 10,90 - 21,03 ]  | 0.107        | 11,4 | [ 6,60 - 17,10 ]   | 9,1       | [ 5,30 - 12,95 ]   | <b>0.001</b> |            |  |  |         |
| Hemoglobin     | [ $\text{mmol/l}$ ]     | 5,0      | [ 4,80 - 5,40 ]    | 5,0  | [ 4,70 - 5,15 ]    | <b>0.046</b> | 5,3  | [ 4,90 - 5,70 ]    | 5,3       | [ 4,80 - 5,60 ]    | 0.166        |            |  |  |         |
| Hematocrite    | [%]                     | 0,24     | [ 0,230 - 0,260 ]  | 0,24 | [ 0,223 - 0,250 ]  | 0.134        | 0,25 | [ 0,230 - 0,280 ]  | 0,25      | [ 0,230 - 0,270 ]  | 0.142        |            |  |  |         |
| Platelet count | [ $\text{Gpt/l}$ ]      | 59       | [ 30,8 - 98,3 ]    | 59   | [ 22,3 - 87,8 ]    | 0.126        | 55   | [ 36,8 - 102,0 ]   | 51        | [ 28,0 - 78,0 ]    | <b>0.001</b> |            |  |  |         |
| Fibrinogen     | [ $\text{g/l}$ ]        | 2,1      | [ 1,25 - 3,20 ]    | 1,9  | [ 1,00 - 3,15 ]    | <b>0.001</b> | 1,5  | [ 0,90 - 2,50 ]    | 1,5       | [ 0,70 - 2,30 ]    | <b>0.001</b> |            |  |  |         |
| pTT            | [ $\text{sec.}$ ]       | 47,9     | [ 41,28 - 57,55 ]  | 47,9 | [ 40,10 - 60,95 ]  | 0.095        | 50,0 | [ 42,00 - 66,00 ]  | 52,0      | [ 44,00 - 69,50 ]  | <b>0.005</b> |            |  |  |         |
| Lactate        | [ $\text{mmol/l}$ ]     | 2,1      | [ 1,38 - 3,40 ]    | 2,3  | [ 1,40 - 4,25 ]    | <b>0.003</b> | 2,3  | [ 1,60 - 5,00 ]    | 2,3       | [ 1,60 - 5,00 ]    | 0.520        |            |  |  |         |
| pH             |                         | 7,35     | [ 7,320 - 7,409 ]  | 7,38 | [ 7,340 - 7,422 ]  | <b>0.006</b> | 7,37 | [ 7,320 - 7,420 ]  | 7,39      | [ 7,340 - 7,430 ]  | <b>0.002</b> |            |  |  |         |
| CRP            | [ $\text{mg/l}$ ]       | 93,1     | [ 58,13 - 121,25 ] | 87,2 | [ 59,58 - 119,50 ] | 0.097        | 63,3 | [ 29,10 - 115,00 ] | 63,3      | [ 28,85 - 113,00 ] | 0.220        |            |  |  |         |
| APACHE-II      |                         | 22       | [ 20,0 - 26,0 ]    | 21   | [ 18,0 - 25,5 ]    | 0.405        | 24   | [ 19,0 - 29,0 ]    | 24        | [ 19,0 - 30,0 ]    | 0.735        |            |  |  |         |
| SAPS-II        |                         | 54       | [ 44,5 - 62,0 ]    | 50   | [ 45,0 - 62,5 ]    | 0.607        | 52   | [ 43,0 - 67,0 ]    | 53        | [ 43,0 - 70,0 ]    | 0.044        |            |  |  |         |
| SOFA           |                         | 14       | [ 11,8 - 16,3 ]    | 13   | [ 12,0 - 16,5 ]    | 0.215        | 15   | [ 13,0 - 18,0 ]    | 16        | [ 14,0 - 19,0 ]    | <b>0.001</b> |            |  |  |         |

MARS: Molecular Adsorbent Recirculating System; ADVOS: Advanced Organ Support System

AST: Aspartate-Amino-Transferase; ALT: Alanine-Amino-Transferase; GLDH: Glutamatedehydrogenase;  $\mu$ -GT: gamma-Glutamyl-Transferase

pTT: Partial Thromboplastin Time; CRP: C-Reactive Protein

APACHE: Acute Physiology and Chronic Health Evaluation; SAPS: Simplified Acute Physiologic Score; SOFA: Sequential Organ Failure Assessment

Table S1b: Changes in laboratory markers and clinical scorings during ECAD treatment in SPAD and OPAL

|                |                         | pre-SPAD |                    |      | post-SPAD          |              |      | p-value            | pre-OPAL |                   |              | post-OPAL |  |  | p-value |
|----------------|-------------------------|----------|--------------------|------|--------------------|--------------|------|--------------------|----------|-------------------|--------------|-----------|--|--|---------|
| Bilirubin      | [ $\mu\text{mol/l}$ ]   | 320      | [ 267,0 - 435,5 ]  | 295  | [ 249,3 - 410,0 ]  | <b>0.001</b> | 304  | [ 204,8 - 395,5 ]  | 234      | [ 158,5 - 339,3 ] | <b>0.001</b> |           |  |  |         |
| AST            | [ $\mu\text{mol/l.s}$ ] | 2,59     | [ 1,895 - 6,543 ]  | 2,42 | [ 1,815 - 7,483 ]  | <b>0.006</b> | 1,59 | [ 1,220 - 2,020 ]  | 1,60     | [ 1,200 - 1,875 ] | <b>0.040</b> |           |  |  |         |
| ALT            | [ $\mu\text{mol/l.s}$ ] | 2,21     | [ 1,198 - 2,945 ]  | 2,04 | [ 1,245 - 3,843 ]  | <b>0.014</b> | 0,89 | [ 0,348 - 2,123 ]  | 0,90     | [ 0,500 - 2,050 ] | 0.112        |           |  |  |         |
| GLDH           | [ $\text{nmol/l.s}$ ]   | 226      | [ 77,3 - 934,3 ]   | 164  | [ 73,8 - 937,0 ]   | <b>0.040</b> | 1    | [ 0,0 - 50,0 ]     | 1        | [ 0,0 - 50,0 ]    | 0.019        |           |  |  |         |
| $\mu$ -GT      | [ $\mu\text{mol/l.s}$ ] | 1,82     | [ 1,028 - 4,480 ]  | 1,73 | [ 0,895 - 3,628 ]  | 0.346        | 0,98 | [ 0,500 - 2,180 ]  | 1,00     | [ 0,500 - 2,400 ] | <b>0.001</b> |           |  |  |         |
| AP             | [ $\mu\text{mol/l.s}$ ] | 3,03     | [ 2,023 - 6,380 ]  | 3,13 | [ 2,000 - 6,225 ]  | <b>0.021</b> | 2,08 | [ 1,285 - 6,220 ]  | 1,90     | [ 1,273 - 5,883 ] | 0.732        |           |  |  |         |
|                |                         |          |                    |      |                    |              |      |                    |          |                   |              |           |  |  |         |
| Creatinine     | [ $\mu\text{mol/l}$ ]   | 145      | [ 84,8 - 204,5 ]   | 139  | [ 105,5 - 193,0 ]  | 0.067        | 115  | [ 67,5 - 149,0 ]   | 77       | [ 52,5 - 121,8 ]  | <b>0.001</b> |           |  |  |         |
| Urea           | [ $\text{mmol/l}$ ]     | 14,2     | [ 7,35 - 20,45 ]   | 15,0 | [ 10,55 - 19,43 ]  | 0.297        | 12,2 | [ 7,23 - 16,30 ]   | 10,4     | [ 6,40 - 13,10 ]  | <b>0.001</b> |           |  |  |         |
|                |                         |          |                    |      |                    |              |      |                    |          |                   |              |           |  |  |         |
| Hemoglobin     | [ $\text{mmol/l}$ ]     | 5,2      | [ 4,83 - 5,58 ]    | 5,2  | [ 4,83 - 5,58 ]    | 0.636        | 5,0  | [ 4,80 - 5,40 ]    | 5,1      | [ 4,73 - 5,30 ]   | 0.856        |           |  |  |         |
| Hematocrite    | [%]                     | 0,25     | [ 0,230 - 0,270 ]  | 0,24 | [ 0,230 - 0,278 ]  | 0.559        | 0,24 | [ 0,220 - 0,260 ]  | 0,24     | [ 0,230 - 0,260 ] | 0.340        |           |  |  |         |
| Platelet count | [ $\text{Gpt/l}$ ]      | 58       | [ 41,0 - 82,8 ]    | 57   | [ 27,3 - 76,3 ]    | <b>0.011</b> | 48   | [ 29,0 - 80,5 ]    | 41       | [ 26,5 - 83,5 ]   | <b>0.051</b> |           |  |  |         |
| Fibrinogen     | [ $\text{g/l}$ ]        | 1,8      | [ 0,95 - 3,85 ]    | 1,8  | [ 1,03 - 3,78 ]    | 0.308        | 1,7  | [ 1,10 - 3,35 ]    | 1,6      | [ 0,90 - 3,40 ]   | <b>0.009</b> |           |  |  |         |
| pTT            | [ $\text{sec.}$ ]       | 42,3     | [ 36,53 - 53,20 ]  | 46,6 | [ 37,83 - 67,35 ]  | <b>0.001</b> | 45,5 | [ 36,48 - 54,53 ]  | 45,3     | [ 34,25 - 58,75 ] | 0.431        |           |  |  |         |
|                |                         |          |                    |      |                    |              |      |                    |          |                   |              |           |  |  |         |
| Lactate        | [ $\text{mmol/l}$ ]     | 2,3      | [ 1,33 - 4,38 ]    | 2,3  | [ 1,50 - 6,08 ]    | <b>0.004</b> | 2,4  | [ 1,33 - 3,40 ]    | 2,4      | [ 1,60 - 3,20 ]   | 0.963        |           |  |  |         |
| pH             |                         | 7,39     | [ 7,318 - 7,420 ]  | 7,40 | [ 7,335 - 7,440 ]  | <b>0.033</b> | 7,42 | [ 7,383 - 7,445 ]  | 7,45     | [ 7,383 - 7,470 ] | <b>0.020</b> |           |  |  |         |
|                |                         |          |                    |      |                    |              |      |                    |          |                   |              |           |  |  |         |
| CRP            | [ $\text{mg/l}$ ]       | 79,0     | [ 36,58 - 126,75 ] | 78,8 | [ 44,70 - 135,50 ] | 0.866        | 73,2 | [ 38,58 - 103,50 ] | 69,9     | [ 40,03 - 96,90 ] | 0.527        |           |  |  |         |
|                |                         |          |                    |      |                    |              |      |                    |          |                   |              |           |  |  |         |
| APACHE-II      |                         | 24       | [ 20,0 - 28,0 ]    | 24   | [ 20,0 - 27,3 ]    | 0.898        | 19   | [ 17,0 - 24,8 ]    | 19       | [ 17,0 - 22,8 ]   | 0.503        |           |  |  |         |
| SAPS-II        |                         | 59       | [ 47,0 - 69,0 ]    | 58   | [ 47,0 - 68,5 ]    | 0.935        | 48   | [ 41,0 - 55,8 ]    | 49       | [ 41,0 - 56,0 ]   | 0.831        |           |  |  |         |
| SOFA           |                         | 14       | [ 12,0 - 17,0 ]    | 14   | [ 12,0 - 16,3 ]    | 0.569        | 14   | [ 11,0 - 15,0 ]    | 14       | [ 11,0 - 17,0 ]   | 0.919        |           |  |  |         |

SPAD: Single Pass Albumin Dialysis; OPAL: Open Albumin

AST: Aspartate-Amino-Transferase; ALT: Alanine-Amino-Transferase; GLDH: Glutamatedehydrogenase;  $\mu$ -GT: gamma-Glutamyl-Transferase

pTT: Partial Thromboplastin Time; CRP: C-Reactive Protein

APACHE: Acute Physiology and Chronic Health Evaluation; SAPS: Simplified Acute Physiologic Score; SOFA: Sequential Organ Failure Assessment

Table S2a: Changes in laboratory markers and clinical scorings during ECAD treatment in MARS and ADVOS with respect to the first treatment cycle

|                |                         | pre-MARS |                    |      | post-MARS          |              |      | p-value            | pre-ADVOS |                    |              | post-ADVOS |  |  | p-value |
|----------------|-------------------------|----------|--------------------|------|--------------------|--------------|------|--------------------|-----------|--------------------|--------------|------------|--|--|---------|
| Bilirubin      | [ $\mu\text{mol/l}$ ]   | 379      | [ 95,0 - 599,5 ]   | 360  | [ 174,0 - 583,0 ]  | <b>0.019</b> | 301  | [ 133,0 - 487,0 ]  | 234       | [ 138,3 - 389,0 ]  | <b>0.001</b> |            |  |  |         |
| AST            | [ $\mu\text{mol/l.s}$ ] | 2,29     | [ 1,100 - 9,125 ]  | 1,96 | [ 0,950 - 3,850 ]  | 0.656        | 3,48 | [ 1,720 - 27,300 ] | 4,76      | [ 2,000 - 24,450 ] | 0.285        |            |  |  |         |
| ALT            | [ $\mu\text{mol/l.s}$ ] | 1,32     | [ 0,620 - 5,525 ]  | 0,83 | [ 0,530 - 1,560 ]  | 0.100        | 1,96 | [ 0,513 - 18,825 ] | 1,60      | [ 0,700 - 10,500 ] | 0.129        |            |  |  |         |
| GLDH           | [ $\text{nmol/l.s}$ ]   | 103      | [ 50,5 - 1444,5 ]  | 75   | [ 50,0 - 786,8 ]   | 0.575        | 169  | [ 51,3 - 4069,3 ]  | 158       | [ 59,0 - 2796,0 ]  | 0.218        |            |  |  |         |
| $\mu$ -GT      | [ $\mu\text{mol/l.s}$ ] | 0,81     | [ 0,660 - 5,075 ]  | 1,17 | [ 0,498 - 5,773 ]  | <b>0.022</b> | 2,54 | [ 0,785 - 4,480 ]  | 2,10      | [ 0,700 - 3,900 ]  | <b>0.026</b> |            |  |  |         |
| AP             | [ $\mu\text{mol/l.s}$ ] | 4,21     | [ 1,825 - 14,600 ] | 2,90 | [ 1,668 - 12,750 ] | 0.092        | 2,86 | [ 1,765 - 6,223 ]  | 2,60      | [ 1,483 - 7,088 ]  | 0.550        |            |  |  |         |
|                |                         |          |                    |      |                    |              |      |                    |           |                    |              |            |  |  |         |
| Creatinine     | [ $\mu\text{mol/l}$ ]   | 115      | [ 85,5 - 219,0 ]   | 120  | [ 69,0 - 332,0 ]   | 0.286        | 167  | [ 90,3 - 235,3 ]   | 121       | [ 83,5 - 173,8 ]   | <b>0.001</b> |            |  |  |         |
| Urea           | [ $\text{mmol/l}$ ]     | 14,6     | [ 7,00 - 20,95 ]   | 13,3 | [ 11,10 - 16,90 ]  | 0.182        | 13,2 | [ 7,48 - 22,13 ]   | 7,7       | [ 5,23 - 14,93 ]   | <b>0.001</b> |            |  |  |         |
|                |                         |          |                    |      |                    |              |      |                    |           |                    |              |            |  |  |         |
| Hemoglobin     | [ $\text{mmol/l}$ ]     | 5,1      | [ 4,90 - 6,25 ]    | 5,1  | [ 4,90 - 5,75 ]    | 0.201        | 5,4  | [ 4,90 - 6,08 ]    | 5,4       | [ 4,80 - 5,60 ]    | 0.159        |            |  |  |         |
| Hematocrite    | [%]                     | 0,25     | [ 0,230 - 0,315 ]  | 0,24 | [ 0,230 - 0,290 ]  | 0.153        | 0,26 | [ 0,230 - 0,298 ]  | 0,25      | [ 0,230 - 0,270 ]  | <b>0.019</b> |            |  |  |         |
| Platelet count | [ $\text{Gpt/l}$ ]      | 75       | [ 36,5 - 117,0 ]   | 51   | [ 19,5 - 88,8 ]    | <b>0.006</b> | 66   | [ 39,3 - 132,8 ]   | 54        | [ 29,0 - 121,0 ]   | <b>0.001</b> |            |  |  |         |
| Fibrinogen     | [ $\text{g/l}$ ]        | 1,7      | [ 1,00 - 3,25 ]    | 2,1  | [ 1,05 - 3,38 ]    | 0.581        | 1,5  | [ 0,70 - 2,43 ]    | 1,3       | [ 0,73 - 2,20 ]    | 0.049        |            |  |  |         |
| pTT            | [ $\text{sec.}$ ]       | 48,0     | [ 42,70 - 60,15 ]  | 50,8 | [ 38,23 - 61,23 ]  | 0.784        | 53,0 | [ 43,00 - 80,30 ]  | 53,6      | [ 44,20 - 79,35 ]  | 0.502        |            |  |  |         |
|                |                         |          |                    |      |                    |              |      |                    |           |                    |              |            |  |  |         |
| Lactate        | [ $\text{mmol/l}$ ]     | 2,7      | [ 1,90 - 9,35 ]    | 2,4  | [ 1,45 - 7,48 ]    | 0.624        | 3,1  | [ 1,80 - 11,83 ]   | 3,5       | [ 2,00 - 9,10 ]    | 0.417        |            |  |  |         |
| pH             |                         | 7,36     | [ 7,310 - 7,435 ]  | 7,40 | [ 7,343 - 7,428 ]  | 0.223        | 7,33 | [ 7,270 - 7,390 ]  | 7,38      | [ 7,333 - 7,430 ]  | <b>0.001</b> |            |  |  |         |
|                |                         |          |                    |      |                    |              |      |                    |           |                    |              |            |  |  |         |
| CRP            | [ $\text{mg/l}$ ]       | 67,1     | [ 25,10 - 140,00 ] | 79,3 | [ 33,40 - 174,00 ] | 0.859        | 61,4 | [ 25,20 - 112,75 ] | 60,3      | [ 29,68 - 107,50 ] | 0.312        |            |  |  |         |
|                |                         |          |                    |      |                    |              |      |                    |           |                    |              |            |  |  |         |
| APACHE-II      |                         | 23       | [ 20,0 - 27,0 ]    | 24   | [ 18,5 - 25,0 ]    | 0.196        | 26   | [ 23,0 - 30,0 ]    | 25        | [ 21,0 - 30,0 ]    | 0.834        |            |  |  |         |
| SAPS-II        |                         | 54       | [ 44,5 - 62,0 ]    | 47   | [ 42,0 - 56,0 ]    | 0.168        | 55   | [ 49,0 - 67,0 ]    | 59        | [ 48,8 - 75,5 ]    | 0.060        |            |  |  |         |
| SOFA           |                         | 13       | [ 11,0 - 18,5 ]    | 14   | [ 9,8 - 18,3 ]     | 0.330        | 15   | [ 12,0 - 18,8 ]    | 16        | [ 14,0 - 19,0 ]    | <b>0.004</b> |            |  |  |         |

MARS: Molecular Adsorbent Recirculating System; ADVOS: Advanced Organ Support System

AST: Aspartate-Amino-Transferase; ALT: Alanine-Amino-Transferase; GLDH: Glutamatedehydrogenase;  $\mu$ -GT: gamma-Glutamyl-Transferase

pTT: Partial Thromboplastin Time; CRP: C-Reactive Protein

APACHE: Acute Physiology and Chronic Health Evaluation; SAPS: Simplified Acute Physiologic Score; SOFA: Sequential Organ Failure Assessment

Table S2b: Changes in laboratory markers and clinical scorings during ECAD treatment in SPAD and OPAL with respect to the first treatment cycle

|                |                         | pre-SPAD |                    |      | post-SPAD          |              |       | p-value            | pre-OPAL |                    |              | post-OPAL |  |  | p-value |
|----------------|-------------------------|----------|--------------------|------|--------------------|--------------|-------|--------------------|----------|--------------------|--------------|-----------|--|--|---------|
| Bilirubin      | [ $\mu\text{mol/l}$ ]   | 319      | [ 205,5 - 521,0 ]  | 279  | [ 189,3 - 420,5 ]  | <b>0.004</b> | 335   | [ 268,0 - 479,3 ]  | 273      | [ 189,8 - 332,8 ]  | <b>0.001</b> |           |  |  |         |
| AST            | [ $\mu\text{mol/l.s}$ ] | 2,51     | [ 1,665 - 18,575 ] | 2,32 | [ 1,460 - 17,800 ] | 0.06         | 1,61  | [ 1,190 - 2,825 ]  | 1,60     | [ 1,100 - 2,900 ]  | 0.401        |           |  |  |         |
| ALT            | [ $\mu\text{mol/l.s}$ ] | 1,09     | [ 0,780 - 9,425 ]  | 1,26 | [ 0,790 - 14,100 ] | 0.096        | 0,78  | [ 0,313 - 2,328 ]  | 0,75     | [ 0,300 - 2,150 ]  | 0.187        |           |  |  |         |
| GLDH           | [ $\text{nmol/l.s}$ ]   | 516      | [ 81,0 - 1857,0 ]  | 315  | [ 79,0 - 2219,0 ]  | 0.038        | 50    | [ 0,5 - 84,5 ]     | 50       | [ 0,0 - 78,3 ]     | 0.173        |           |  |  |         |
| $\mu$ -GT      | [ $\mu\text{mol/l.s}$ ] | 1,92     | [ 1,060 - 4,085 ]  | 1,64 | [ 0,910 - 3,090 ]  | 0.532        | 1,10  | [ 0,650 - 6,325 ]  | 1,85     | [ 0,575 - 5,210 ]  | 0.754        |           |  |  |         |
| AP             | [ $\mu\text{mol/l.s}$ ] | 2,79     | [ 1,355 - 6,210 ]  | 3,28 | [ 1,905 - 7,753 ]  | 0.507        | 2,42  | [ 1,690 - 5,383 ]  | 2,51     | [ 1,480 - 6,813 ]  | 0.753        |           |  |  |         |
|                |                         |          |                    |      |                    |              |       |                    |          |                    |              |           |  |  |         |
| Creatinine     | [ $\mu\text{mol/l}$ ]   | 160      | [ 110,0 - 245,5 ]  | 140  | [ 96,0 - 223,0 ]   | <b>0.012</b> | 143   | [ 112,8 - 221,0 ]  | 103      | [ 74,0 - 129,5 ]   | <b>0.004</b> |           |  |  |         |
| Urea           | [ $\text{mmol/l}$ ]     | 14,8     | [ 6,30 - 20,60 ]   | 14,9 | [ 7,13 - 18,28 ]   | 0.059        | 19,9  | [ 9,08 - 24,65 ]   | 13,3     | [ 10,93 - 20,13 ]  | <b>0.008</b> |           |  |  |         |
|                |                         |          |                    |      |                    |              |       |                    |          |                    |              |           |  |  |         |
| Hemoglobin     | [ $\text{mmol/l}$ ]     | 5,1      | [ 4,85 - 5,70 ]    | 5,5  | [ 5,10 - 6,20 ]    | 0.192        | 5,1   | [ 4,70 - 5,45 ]    | 5,1      | [ 4,68 - 5,40 ]    | 0.448        |           |  |  |         |
| Hematocrite    | [%]                     | 0,25     | [ 0,225 - 0,285 ]  | 0,27 | [ 0,235 - 0,305 ]  | 0.259        | 0,23  | [ 0,218 - 0,263 ]  | 0,24     | [ 0,220 - 0,260 ]  | 0.242        |           |  |  |         |
| Platelet count | [Gpt/l]                 | 61       | [ 44,5 - 99,0 ]    | 60   | [ 22,0 - 82,0 ]    | <b>0.005</b> | 74    | [ 33,0 - 136,0 ]   | 58       | [ 35,8 - 107,5 ]   | 0.158        |           |  |  |         |
| Fibrinogen     | [g/l]                   | 1,6      | [ 1,13 - 2,38 ]    | 1,3  | [ 0,70 - 2,20 ]    | 0.789        | 1,8   | [ 1,1000 - 3,05 ]  | 2,0      | [ 0,40 - 4,15 ]    | 0.277        |           |  |  |         |
| pTT            | [sec.]                  | 44,9     | [ 35,75 - 65,75 ]  | 48,9 | [ 36,20 - 84,00 ]  | 0.136        | 45,5  | [ 41,68 - 55,98 ]  | 48,1     | [ 35,25 - 66,48 ]  | 0.600        |           |  |  |         |
|                |                         |          |                    |      |                    |              |       |                    |          |                    |              |           |  |  |         |
| Lactate        | [ $\text{mmol/l}$ ]     | 2,4      | [ 1,50 - 4,15 ]    | 2,7  | [ 1,65 - 6,30 ]    | 0.061        | 2,2   | [ 1,30 - 3,43 ]    | 2,1      | [ 1,48 - 3,43 ]    | 0.875        |           |  |  |         |
| pH             |                         | 7,36     | [ 7,280 - 7,420 ]  | 7,39 | [ 7,290 - 7,460 ]  | 0.609        | 7,43  | [ 7,378 - 7,442 ]  | 7,42     | [ 7,345 - 7,463 ]  | 0.969        |           |  |  |         |
|                |                         |          |                    |      |                    |              |       |                    |          |                    |              |           |  |  |         |
| CRP            | [ $\text{mg/l}$ ]       | 72,2     | [ 30,85 - 85,80 ]  | 65,5 | [ 32,70 - 99,80 ]  | 0.820        | 110,0 | [ 29,40 - 148,50 ] | 98,9     | [ 26,10 - 135,00 ] | 0.300        |           |  |  |         |
|                |                         |          |                    |      |                    |              |       |                    |          |                    |              |           |  |  |         |
| APACHE-II      |                         | 25       | [ 18,3 - 29,5 ]    | 22   | [ 17,5 - 31,5 ]    | 0.166        | 19    | [ 18,0 - 25,8 ]    | 19       | [ 16,8 - 21,0 ]    | <b>0.027</b> |           |  |  |         |
| SAPS-II        |                         | 61       | [ 44,8 - 78,5 ]    | 61   | [ 42,5 - 69,0 ]    | <b>0.026</b> | 47    | [ 38,3 - 55,3 ]    | 47       | [ 41,8 - 58,0 ]    | 0.783        |           |  |  |         |
| SOFA           |                         | 15       | [ 9,5 - 17,8 ]     | 12   | [ 8,0 - 15,5 ]     | <b>0.011</b> | 14    | [ 10,5 - 15,3 ]    | 13       | [ 11,0 - 17,3 ]    | 0.804        |           |  |  |         |

SPAD: Single Pass Albumin Dialysis; OPAL: Open Albumin

AST: Aspartate-Amino-Transferase; ALT: Alanine-Amino-Transferase; GLDH: Glutamatedehydrogenase;  $\mu$ -GT: gamma-Glutamyl-Transferase

pTT: Partial Thromboplastin Time; CRP: C-Reactive Protein

APACHE: Acute Physiology and Chronic Health Evaluation; SAPS: Simplified Acute Physiologic Score; SOFA: Sequential Organ Failure Assessment

Table S3: Transfusion requirements during ECAD.

|                     |         | MARS |       | ADVOS |       | SPAD |       | OPAL |       |
|---------------------|---------|------|-------|-------|-------|------|-------|------|-------|
| Red blood cells     | [Units] | 0    | [0-1] | 1     | [0-2] | 0    | [0-1] | 0    | [0-1] |
| Platelets           | [Units] | 0    | [0-0] | 0     | [0-0] | 0    | [0-0] | 0    | [0-0] |
| Fresh frozen plasma | [Units] | 0    | [0-0] | 0     | [0-0] | 0    | [0-0] | 0    | [0-0] |
| Prothrombin Complex | [IU]    | 0    | [0-0] | 0     | [0-0] | 0    | [0-0] | 0    | [0-0] |
| Fibrinogen          | [g]     | 0    | [0-0] | 0     | [0-0] | 0    | [0-0] | 0    | [0-0] |

IU: International Units; g: Grams;

MARS: Molecular Adsorbent Recirculating System

ADVOS: Advances Organ Support System

SPAD: Single Pass Albumin Dialysis

OPAL: Open Albumin

Table S4 a:

|                |            | Total cohort             |         |                   |         |
|----------------|------------|--------------------------|---------|-------------------|---------|
|                |            | Heparin                  |         | Citrate           | p-value |
| Bilirubin      | [%]-change | -10.4 [ -21.97 - -3.86 ] | -9.7 [  | -21.77 - 0.00 ]   | 0.30    |
| Ammonia        | [%]-change | -8.4 [ -23.24 - 10.92 ]  | -7.4 [  | -24.12 - 9.88 ]   | 0.83    |
| Creatinine     | [%]-change | -10.9 [ -27.01 - 1.51 ]  | -13.5 [ | -28.85 - 0.14 ]   | 0.49    |
| Urea           | [%]-change | -5.5 [ -23.33 - 9.13 ]   | -19.6 [ | -35.53 - -0.92 ]  | 0.06    |
| Hemoglobin     | [%]-change | -2.0 [ -8.16 - 6.00 ]    | 0.0 [   | -6.52 - 5.90 ]    | 0.353.  |
| Platelet count | [%]-change | -9.8 [ -30.33 - 10.49 ]  | -13.4 [ | -32.28 - 8.19 ]   | 0.48    |
| Fibrinogen     | [%]-change | -4.8 [ -15.00 - 0.00 ]   | -8.0 [  | -30.79 - 5.48 ]   | 0.47    |
| INR            | [%]-change | 0.0 [ -7.14 - 7.14 ]     | 0.0 [   | -7.69 - 14.29 ]   | 0.15    |
| Lactate        | [%]-change | 3.6 [ -11.11 - 25.00 ]   | 3.9 [   | -15.38 - 34.29 ]  | 0.94    |
| pH             | [%]-change | 0.1 [ -0.27 - 0.68 ]     | 0.3 [   | -0.27 - 0.81 ]    | 0.18    |
| Base Excess    | [%]-change | -18.6 [ -50.00 - 35.81 ] | -34.0 [ | -111.06 - 44.62 ] | 0.06    |

INR: International normalized ratio

Table S4b:

|                |            | MARS                     |                          |         | OPAL                        |                          |         |
|----------------|------------|--------------------------|--------------------------|---------|-----------------------------|--------------------------|---------|
|                |            | Heparin                  | Citrate                  | p-value | Heparin                     | Citrate                  | p-value |
| Bilirubin      | [%]-change | -8.7 [ -21.70 - -4.39 ]  | -7.9 [ -15.83 - -4.28 ]  | 0.65    | -10.8 [ -21.14 - -6.85 ]    | -15.9 [ -29.70 - -4.62 ] | 0.76    |
| Ammonia        | [%]-change | -3.2 [ -22.56 - 13.56 ]  | -2.0 [ -26.42 - 43.86 ]  | 0.74    | -8.3 [ -23.21 - ]           | -10.1 [ -23.91 - 1.06 ]  | 0.71    |
| Creatinine     | [%]-change | -11.1 [ -25.30 - -3.03 ] | -9.4 [ -19.55 - 12.75 ]  | 0.26    | -20.1 [ -31.19 - 1.65 ]     | -22.4 [ -38.89 - -3.85 ] | 0.63    |
| Urea           | [%]-change | 1.7 [ -12.84 - 8.92 ]    | -19.3 [ -27.79 - -4.53 ] | 0.12    | -7.0 [ -20.13 - 3.07 ]      | -19.1 [ -32.18 - 2.29 ]  | 0.42    |
| Hemoglobin     | [%]-change | -2.1 [ -7.41 - 2.00 ]    | -2.1 [ -9.59 - 2.69 ]    | 0.96    | 9.4 [ 6.98 - 16.75 ]        | 0.0 [ -4.92 - 5.88 ]     | 0.06    |
| Platelet count | [%]-change | -0.7 [ -21.43 - 10.63 ]  | -5.7 [ -17.73 - 9.09 ]   | 0.77    | -2.6 [ -23.32 - 43.61 ]     | -2.5 [ -27.54 - 13.51 ]  | 0.84    |
| Fibrinogen     | [%]-change | -5.7 [ -12.50 - -3.15 ]  | -16.7 [ -46.15 - 1.07 ]  | 0.07    | -1.1 [ -3.66 - 4.69 ]       | -7.7 [ -20.00 - 0.00 ]   | 0.22    |
| INR            | [%]-change | 0.0 [ -7.14 - 0.00 ]     | 9.4 [ 0.00 - 41.17 ]     | 0.06    | 0.0 [ -5.77 - 3.95 ]        | 0.0 [ -8.33 - 9.09 ]     | 0.80    |
| Lactate        | [%]-change | 11.1 [ -2.94 - 31.53 ]   | 21.9 [ -8.53 - 63.89 ]   | 0.37    | 9.8 [ -3.69 - 21.98 ]       | -6.3 [ -20.00 - 19.51 ]  | 0.32    |
| pH             | [%]-change | 0.3 [ -0.20 - 0.68 ]     | 0.1 [ -0.27 - 0.50 ]     | 0.58    | -0.3 [ -0.77 - 1.01 ]       | 0.3 [ -0.13 - 0.67 ]     | 0.37    |
| Base Excess    | [%]-change | -14.1 [ -38.23 - 34.34 ] | -24.7 [ -77.72 - 71.36 ] | 0.52    | -40.4 [ -174.81 - 2172.12 ] | -18.6 [ -66.67 - 45.45 ] | 0.86    |

MARS: Molecular Adsorbent Recirculating System; #OPAL: Open Albumin

INR: International normalized ratio



Table S4c:

|                |            | ADVOS                    |                          |         | SPAD                     |                          |             |
|----------------|------------|--------------------------|--------------------------|---------|--------------------------|--------------------------|-------------|
|                |            | Heparin                  | Citrate                  | p-value | Heparin                  | Citrate                  | p-value     |
| Bilirubin      | [%]-change | -15.0 [ -23.65 - -6.25 ] | -15.9 [ -29.70 - -4.62 ] | 0.08    | -7.4 [ -17.66 - -2.11 ]  | -9.2 [ -14.33 - 1.51 ]   | 0.70        |
| Ammonia        | [%]-change | -10.1 [ -22.79 - 8.17 ]  | -10.1 [ -23.91 - 1.06 ]  | 0.83    | -12.4 [ -22.80 - 11.48 ] | 3.0 [ -16.57 - 26.24 ]   | 0.21        |
| Creatinine     | [%]-change | -15.2 [ -32.25 - -0.41 ] | -22.4 [ -38.89 - -3.85 ] | 0.55    | -1.6 [ -14.64 - 15.80 ]  | -7.8 [ -16.62 - 6.28 ]   | 0.48        |
| Urea           | [%]-change | -20.0 [ -34.45 - 3.80 ]  | -19.1 [ -32.18 - 2.29 ]  | 0.36    | 3.6 [ -15.25 - 27.67 ]   | -7.6 [ -16.32 - 6.90 ]   | 0.23        |
| Hemoglobin     | [%]-change | -2.8 [ -10.54 - 5.43 ]   | 0.0 [ -4.92 - 5.88 ]     | 0.55    | -2.4 [ -8.38 - 7.14 ]    | 3.8 [ -2.46 - 8.13 ]     | 0.15        |
| Platelet count | [%]-change | -27.6 [ -44.28 - -9.50 ] | -2.5 [ -27.54 - 13.51 ]  | 0.28    | -4.4 [ -19.77 - 26.68 ]  | -13.9 [ -20.36 - 1.52 ]  | 0.25        |
| Fibrinogen     | [%]-change | -18.1 [ -25.28 - -0.74 ] | -7.7 [ -20.00 - 0.00 ]   | 0.54    | -2.6 [ -8.85 - 7.08 ]    | 0.0 [ -8.51 - 5.26 ]     | 0.90        |
| INR            | [%]-change | 0.0 [ -7.14 - 11.10 ]    | 0.0 [ -8.33 - 9.09 ]     | 0.95    | 0.0 [ -6.47 - 7.14 ]     | 0.0 [ 0.00 - 8.88 ]      | 0.17        |
| Lactate        | [%]-change | 1.8 [ -17.08 - 23.44 ]   | -6.3 [ -20.00 - 19.51 ]  | 0.86    | -2.6 [ -16.67 - 10.79 ]  | 17.0 [ -7.14 - 59.17 ]   | <b>0.04</b> |
| pH             | [%]-change | 0.1 [ -0.25 - 0.81 ]     | 0.3 [ -0.13 - 0.67 ]     | 0.76    | -0.2 [ -0.40 - 0.12 ]    | 0.7 [ 0.00 - 0.88 ]      | <b>0.00</b> |
| Base Excess    | [%]-change | -12.2 [ -48.55 - 23.27 ] | -18.6 [ -66.67 - 45.45 ] | 0.06    | -20.0 [ -69.20 - 45.48 ] | 42.1 [ -72.17 - 150.18 ] | 0.16        |

ADVOS: Advanced Organ Support System; SPAD: Single Pass Albumin Dialysis

INR: International normalized ratio
